# Supplementary material
Source: publisher site journal article supplement (https://www.dovepress.com/article/349669)
Supplement: Supplementary file 1 [file get_supplementary_file.php]

**Supplemental Table 1:** Performance comparison of LabTurboTM AIO COVID-19 RNA testing kit and WHO-recommended RT-PCR assay using clinically known samples with the Rotor-Gene-Q real-time PCR instrument

| Sample case | WHO | | | QIAGEN | | | Variants |
| --- | --- | --- | --- | --- | --- | --- | --- |
| *E* | *RdRp* | *RNase P* | *N*1 | *E* | *RNase P* |
| 1 | 12.19 | 12.08 | 23.34 | 11.65 | 11.84 | 22.72 | Alpha |
| 2 | 15.66 | 15.83 | 24.68 | 15.29 | 15.52 | 23.98 | Alpha |
| 3 | 16.60 | 16.82 | 23.63 | 16.04 | 16.06 | 22.91 | Alpha |
| 4 | 16.50 | 16.72 | 25.80 | 16.46 | 16.40 | 25.09 | Alpha |
| 5 | 18.03 | 17.95 | 25.89 | 17.70 | 17.66 | 25.32 | Alpha |
| 6 | 19.44 | 19.61 | 26.55 | 19.29 | 19.20 | 26.40 | Alpha |
| 7 | 19.93 | 19.90 | 24.92 | 19.32 | 19.73 | 24.79 | Alpha |
| 8 | 19.52 | 19.69 | 25.76 | 19.46 | 19.32 | 25.97 | Alpha |
| 9 | 19.90 | 19.76 | 28.15 | 19.50 | 19.51 | 27.63 | Alpha |
| 10 | 19.65 | 19.87 | 26.14 | 19.58 | 19.55 | 25.33 | Alpha |
| 11 | 20.38 | 20.42 | 27.39 | 19.72 | 20.30 | 26.67 | Alpha |
| 12 | 20.43 | 20.69 | 24.45 | 20.07 | 20.41 | 23.71 | Alpha |
| 13 | 20.97 | 21.01 | 25.94 | 20.28 | 20.86 | 25.22 | Alpha |
| 14 | 20.96 | 20.93 | 29.97 | 20.59 | 20.74 | 29.76 | Alpha |
| 15 | 20.94 | 20.93 | 28.33 | 20.59 | 20.66 | 27.53 | Alpha |
| 16 | 21.88 | 21.77 | 26.38 | 20.62 | 20.86 | 25.10 | Alpha |
| 17 | 20.87 | 20.88 | 27.64 | 20.62 | 20.66 | 26.93 | Alpha |
| 18 | 20.96 | 20.89 | 27.02 | 20.66 | 20.76 | 26.52 | Alpha |
| 19 | 21.51 | 21.59 | 25.73 | 20.96 | 21.27 | 25.16 | Alpha |
| 20 | 21.44 | 21.58 | 25.73 | 21.05 | 21.08 | 25.23 | Alpha |
| 21 | 21.40 | 21.57 | 25.98 | 21.06 | 21.26 | 26.02 | Alpha |
| 22 | 22.44 | 22.41 | 27.32 | 21.63 | 22.29 | 26.43 | Alpha |
| 23 | 22.83 | 22.82 | 27.12 | 22.35 | 22.42 | 26.60 | Alpha |
| 24 | 23.03 | 22.75 | 25.04 | 22.38 | 22.85 | 24.57 | Alpha |
| 25 | 23.95 | 24.08 | 26.41 | 23.03 | 23.74 | 25.02 | Alpha |
| 26 | 25.16 | 25.11 | 25.75 | 24.94 | 25.04 | 24.54 | Alpha |
| 27 | 26.23 | 26.13 | 27.79 | 25.67 | 25.98 | 27.28 | Alpha |
| 28 | 26.94 | 27.12 | 25.87 | 26.04 | 26.61 | 25.89 | Alpha |
| 29 | 27.21 | 27.52 | 26.65 | 26.75 | 26.94 | 25.82 | Alpha |
| 30 | 22.34 | 22.61 | 26.33 | 21.51 | 22.36 | 26.36 | Alpha |
| 31 | 26.60 | 24.82 | 26.23 | 22.59 | 26.37 | 25.74 | Alpha |
| 32 | 29.21 | 27.51 | 26.57 | 25.14 | 29.02 | 25.40 | Alpha |
| 33 | 32.72 | 29.87 | 27.57 | 27.16 | 32.09 | 26.29 | Alpha |
| 34 | 33.99 | 32.30 | 27.73 | 29.06 | 33.34 | 27.10 | Alpha |
| 35 | 35.99 | 33.66 | 27.12 | 30.38 | 33.33 | 26.43 | Alpha |
| 36 | 21.14 | 19.50 | 25.88 | 16.76 | 20.91 | 25.85 | Alpha |
| 37 | 27.54 | 27.40 | 24.67 | 26.93 | 27.57 | 23.97 | Alpha |
| 38 | 31.77 | 32.76 | 25.95 | 31.11 | 31.19 | 26.13 | Alpha |
| 39 | 22.01 | 21.03 | 24.30 | 17.69 | 21.52 | 23.16 | Alpha |
| 40 | 25.24 | 24.14 | 28.51 | 20.76 | 24.68 | 27.84 | Alpha |
| 41 | 28.28 | 27.21 | 28.13 | 23.84 | 27.84 | 27.41 | Alpha |
| 42 | 30.17 | 29.56 | 27.53 | 26.15 | 30.60 | 26.75 | Alpha |
| 43 | 31.60 | 30.49 | 26.43 | 26.76 | 31.82 | 26.10 | Alpha |
| 44 | 32.33 | 31.54 | 29.40 | 28.11 | 32.37 | 28.94 | Alpha |
| 45 | 21.52 | 19.65 | 27.30 | 17.70 | 21.36 | 26.22 | Alpha |
| 46 | 27.92 | 25.84 | 27.18 | 23.78 | 27.32 | 26.96 | Alpha |
| 47 | 30.59 | 28.16 | 26.93 | 26.33 | 30.50 | 26.17 | Alpha |
| 48 | 33.89 | 30.10 | 26.90 | 28.72 | 33.67 | 26.68 | Alpha |
| 49 | 32.90 | 30.11 | 28.47 | 28.93 | 32.04 | 28.16 | Alpha |
| 50 | 25.89 | 24.31 | 29.60 | 21.51 | 25.55 | 28.55 | Alpha |
| 51 | 31.69 | 29.02 | 26.68 | 25.64 | 29.95 | 26.26 | Alpha |
| 52 | 33.28 | 32.25 | 26.92 | 28.50 | 33.82 | 26.40 | Alpha |
| 53 | 31.74 | 31.54 | 26.95 | 28.07 | 33.10 | 25.74 | Alpha |
| 54 | 26.06 | 25.91 | 24.39 | 23.95 | 25.79 | 23.81 | Alpha |
| 55 | 28.42 | 28.27 | 28.74 | 26.31 | 28.37 | 28.29 | Alpha |
| 56 | 31.11 | 30.42 | 26.60 | 28.74 | 30.60 | 26.17 | Alpha |
| 57 | 33.04 | 32.33 | 26.26 | 30.84 | 32.40 | 26.02 | Alpha |
| 58 | 21.77 | 21.35 | 28.32 | 19.48 | 21.51 | 27.83 | Alpha |
| 59 | 25.52 | 24.87 | 25.62 | 23.03 | 25.18 | 25.84 | Alpha |
| 60 | 28.52 | 27.79 | 27.44 | 26.05 | 28.24 | 27.17 | Alpha |
| 61 | 31.16 | 30.25 | 27.77 | 28.27 | 30.93 | 27.52 | Alpha |
| 62 | 32.35 | 32.12 | 29.05 | 29.85 | 32.09 | 28.70 | Alpha |
| 63 | 24.79 | 23.82 | 27.04 | 20.51 | 24.45 | 25.88 | Alpha |
| 64 | 28.80 | 28.21 | 26.89 | 24.47 | 28.65 | 26.93 | Alpha |
| 65 | 32.12 | 30.00 | 27.28 | 26.80 | 30.61 | 26.59 | Alpha |
| 66 | 35.97 | 33.30 | 26.63 | 30.61 | 33.45 | 25.81 | Alpha |
| 67 | 23.51 | 22.30 | 27.72 | 19.31 | 23.14 | 27.47 | Alpha |
| 68 | 28.18 | 27.02 | 27.84 | 23.84 | 27.79 | 27.27 | Alpha |
| 69 | 30.67 | 29.61 | 27.01 | 26.49 | 30.38 | 26.60 | Alpha |
| 70 | 33.27 | 31.09 | 27.05 | 29.28 | 32.81 | 26.74 | Alpha |
| 71 | 23.60 | 22.62 | 25.20 | 19.70 | 23.22 | 24.81 | Alpha |
| 72 | 27.86 | 27.05 | 27.63 | 23.94 | 27.38 | 27.01 | Alpha |
| 73 | 31.25 | 30.60 | 26.66 | 27.09 | 31.03 | 25.50 | Alpha |
| 74 | 33.01 | 31.51 | 26.98 | 28.68 | 31.64 | 25.67 | Alpha |
| 75 | 23.80 | 23.01 | 28.50 | 19.83 | 23.46 | 27.36 | Alpha |
| 76 | 26.49 | 25.61 | 26.30 | 22.48 | 26.15 | 25.55 | Alpha |
| 77 | 32.12 | 30.26 | 25.95 | 27.45 | 31.19 | 25.37 | Alpha |
| 78 | 34.57 | 32.82 | 27.21 | 29.42 | 33.99 | 25.79 | Alpha |
| 79 | 21.18 | 20.26 | 24.81 | 16.97 | 20.89 | 24.59 | Alpha |
| 80 | 23.42 | 22.27 | 28.07 | 19.41 | 23.00 | 27.21 | Alpha |
| 81 | 28.09 | 26.88 | 31.02 | 23.94 | 27.89 | 30.92 | Alpha |
| 82 | 30.55 | 28.86 | 23.56 | 26.71 | 31.02 | 23.46 | Alpha |
| 83 | 32.71 | 30.77 | 24.89 | 27.96 | 32.80 | 23.71 | Alpha |
| 84 | 23.98 | 23.11 | 24.29 | 20.17 | 23.78 | 23.18 | Alpha |
| 85 | 23.09 | 22.17 | 27.06 | 19.09 | 22.70 | 26.24 | Alpha |
| 86 | 25.63 | 24.61 | 26.09 | 21.71 | 25.31 | 25.51 | Alpha |
| 87 | 28.53 | 27.74 | 27.48 | 24.73 | 28.17 | 26.89 | Alpha |
| 88 | 31.25 | 29.70 | 25.16 | 27.41 | 32.02 | 23.95 | Alpha |
| 89 | 20.60 | 20.45 | 29.14 | 20.18 | 20.19 | 28.60 | Alpha |
| 90 | 22.26 | 22.35 | 26.63 | 21.69 | 22.01 | 26.04 | Alpha |
| 91 | 26.04 | 25.99 | 26.65 | 25.81 | 25.92 | 25.40 | Alpha |
| 92 | 27.53 | 25.69 | 27.15 | 23.38 | 27.29 | 26.64 | Alpha |
| 93 | 29.10 | 28.00 | 28.95 | 24.53 | 28.65 | 28.20 | Alpha |
| 94 | 28.90 | 26.74 | 28.13 | 24.61 | 28.28 | 27.90 | Alpha |
| 95 | 33.22 | 32.37 | 23.24 | 31.26 | 30.53 | 21.30 | Delta |
| 96 | 24.27 | 22.23 | 24.78 | 22.65 | 20.39 | 22.91 | Delta |
| 97 | 27.40 | 26.52 | 25.89 | 25.83 | 24.84 | 23.25 | Delta |
| 98 | 19.46 | 19.28 | 28.41 | 17.64 | 17.22 | 26.48 | Beta |
| 99 | 26.56 | 26.09 | 26.75 | 24.50 | 23.93 | 24.45 | Beta |
| 100 | 26.43 | 26.41 | 25.20 | 24.61 | 24.03 | 23.35 | Beta |
| 101 | 24.10 | 25.39 | 24.65 | 23.58 | 23.96 | 24.62 | Delta |
| 102 | 28.52 | 27.38 | 27.35 | 26.25 | 28.31 | 27.14 | Delta |

**Supplemental Table 2:** Performance comparison of LabTurboTM AIO COVID-19 RNA testing kit assay and WHO-recommended RT-PCR assay using clinically known samples with the Roche LightCycler96 instrument

| Sample case | WHO | | | Roche | | | Variants |
| --- | --- | --- | --- | --- | --- | --- | --- |
| *E* | *RdRp* | *RNase P* | *N*1 | *E* | *RNase P* |
| 1 | 13.38 | 12.33 | 23.60 | 11.92 | 13.25 | 22.68 | Alpha |
| 2 | 17.03 | 15.69 | 25.09 | 11.99 | 15.93 | 24.17 | Alpha |
| 3 | 17.24 | 16.63 | 24.12 | 14.46 | 16.71 | 23.01 | Alpha |
| 4 | 17.72 | 16.15 | 26.16 | 16.47 | 16.05 | 25.08 | Alpha |
| 5 | 18.94 | 18.56 | 25.66 | 15.99 | 18.40 | 24.98 | Alpha |
| 6 | 20.41 | 18.59 | 27.20 | 16.63 | 19.56 | 26.34 | Alpha |
| 7 | 19.88 | 19.18 | 25.78 | 17.51 | 19.31 | 24.59 | Alpha |
| 8 | 19.77 | 18.61 | 26.51 | 16.88 | 19.11 | 25.50 | Alpha |
| 9 | 20.54 | 18.15 | 28.74 | 17.97 | 18.06 | 27.53 | Alpha |
| 10 | 18.80 | 17.94 | 26.00 | 17.59 | 18.47 | 25.08 | Alpha |
| 11 | 21.55 | 20.18 | 27.67 | 18.72 | 20.87 | 26.97 | Alpha |
| 12 | 21.08 | 20.41 | 24.26 | 17.99 | 20.44 | 23.54 | Alpha |
| 13 | 23.25 | 20.95 | 25.71 | 18.09 | 21.94 | 25.10 | Alpha |
| 14 | 21.02 | 20.62 | 30.28 | 19.33 | 21.15 | 29.41 | Alpha |
| 15 | 21.89 | 21.79 | 28.48 | 21.03 | 22.90 | 27.23 | Alpha |
| 16 | 21.67 | 21.08 | 25.91 | 19.67 | 21.33 | 25.43 | Alpha |
| 17 | 20.04 | 19.89 | 28.03 | 18.96 | 20.56 | 27.07 | Alpha |
| 18 | 22.18 | 22.39 | 26.85 | 21.02 | 22.45 | 26.42 | Alpha |
| 19 | 30.35 | 30.23 | 26.46 | 28.03 | 29.06 | 25.45 | Alpha |
| 20 | 30.83 | 30.12 | 26.10 | 29.22 | 29.68 | 25.13 | Alpha |
| 21 | 34.09 | 33.86 | 26.30 | 31.18 | 32.09 | 25.65 | Alpha |
| 22 | 22.90 | 22.30 | 27.48 | 21.46 | 22.48 | 26.62 | Alpha |
| 23 | 22.34 | 21.18 | 27.50 | 19.56 | 21.53 | 26.50 | Alpha |
| 24 | 26.53 | 24.78 | 25.60 | 23.05 | 25.42 | 24.70 | Alpha |
| 25 | 26.61 | 23.95 | 25.98 | 20.77 | 24.72 | 25.24 | Alpha |
| 26 | 27.28 | 26.53 | 25.19 | 24.56 | 26.31 | 24.92 | Alpha |
| 27 | 27.66 | 26.30 | 27.91 | 25.57 | 26.24 | 26.84 | Alpha |
| 28 | 28.83 | 27.10 | 26.89 | 26.06 | 27.68 | 25.65 | Alpha |
| 29 | 28.83 | 29.80 | 26.62 | 27.56 | 28.81 | 25.56 | Alpha |
| 30 | 33.48 | 33.27 | 26.63 | 29.20 | 29.32 | 25.95 | Alpha |
| 31 | 27.60 | 25.86 | 26.26 | 23.09 | 26.07 | 25.97 | Alpha |
| 32 | 29.84 | 28.76 | 26.65 | 25.57 | 28.59 | 25.46 | Alpha |
| 33 | 30.42 | 29.99 | 27.16 | 27.69 | 31.09 | 26.66 | Alpha |
| 34 | 34.58 | 32.65 | 27.18 | 29.47 | 33.94 | 26.83 | Alpha |
| 35 | 35.04 | 34.45 | 27.23 | 30.66 | 33.82 | 26.38 | Alpha |
| 36 | 22.07 | 20.14 | 26.83 | 17.03 | 20.39 | 25.58 | Alpha |
| 37 | 28.59 | 28.42 | 24.72 | 27.61 | 28.15 | 24.22 | Alpha |
| 38 | 32.47 | 32.08 | 26.61 | 31.02 | 31.46 | 25.64 | Alpha |
| 39 | 22.95 | 21.85 | 24.50 | 17.82 | 22.18 | 23.50 | Alpha |
| 40 | 26.15 | 25.10 | 29.20 | 21.00 | 24.89 | 27.97 | Alpha |
| 41 | 29.17 | 28.47 | 27.51 | 24.25 | 27.69 | 27.21 | Alpha |
| 42 | 30.80 | 29.94 | 27.63 | 26.74 | 30.48 | 26.39 | Alpha |
| 43 | 32.07 | 30.47 | 27.02 | 27.19 | 30.91 | 25.93 | Alpha |
| 44 | 33.49 | 33.22 | 29.22 | 28.14 | 32.16 | 28.59 | Alpha |
| 45 | 26.29 | 24.27 | 26.69 | 21.73 | 25.12 | 26.27 | Alpha |
| 46 | 29.06 | 26.47 | 27.44 | 24.10 | 27.24 | 26.67 | Alpha |
| 47 | 31.45 | 28.25 | 26.45 | 26.99 | 30.82 | 26.15 | Alpha |
| 48 | 33.84 | 32.05 | 26.63 | 28.93 | 32.44 | 26.33 | Alpha |
| 49 | 34.05 | 32.05 | 28.17 | 29.37 | 32.12 | 27.63 | Alpha |
| 50 | 26.98 | 25.17 | 29.05 | 21.55 | 25.78 | 28.57 | Alpha |
| 51 | 31.89 | 30.37 | 26.35 | 24.84 | 28.87 | 26.01 | Alpha |
| 52 | 34.68 | 33.85 | 27.04 | 29.00 | 32.47 | 25.99 | Alpha |
| 53 | 34.01 | 33.01 | 26.50 | 28.86 | 33.18 | 25.96 | Alpha |
| 54 | 27.75 | 26.73 | 25.20 | 25.14 | 26.50 | 24.00 | Alpha |
| 55 | 29.99 | 29.45 | 28.53 | 27.51 | 28.92 | 27.92 | Alpha |
| 56 | 32.67 | 32.32 | 26.17 | 29.94 | 31.51 | 25.67 | Alpha |
| 57 | 33.54 | 33.47 | 26.66 | 31.80 | 33.60 | 25.97 | Alpha |
| 58 | 23.35 | 22.30 | 28.65 | 20.22 | 22.21 | 27.58 | Alpha |
| 59 | 26.93 | 26.02 | 25.97 | 24.14 | 25.87 | 25.28 | Alpha |
| 60 | 29.96 | 29.15 | 27.82 | 27.06 | 28.61 | 26.93 | Alpha |
| 61 | 32.17 | 31.30 | 28.17 | 29.26 | 30.91 | 27.27 | Alpha |
| 62 | 33.25 | 33.27 | 29.63 | 31.28 | 32.79 | 28.69 | Alpha |
| 63 | 26.55 | 24.87 | 26.69 | 21.13 | 24.79 | 26.12 | Alpha |
| 64 | 30.54 | 29.13 | 26.91 | 25.16 | 28.51 | 26.47 | Alpha |
| 65 | 32.38 | 31.49 | 27.47 | 27.29 | 30.97 | 26.58 | Alpha |
| 66 | 35.35 | 34.25 | 26.77 | 32.52 | 34.30 | 25.95 | Alpha |
| 67 | 24.78 | 23.61 | 28.20 | 19.91 | 23.40 | 27.23 | Alpha |
| 68 | 29.35 | 28.25 | 27.73 | 24.53 | 27.66 | 26.95 | Alpha |
| 69 | 32.04 | 30.68 | 27.51 | 27.19 | 30.64 | 26.65 | Alpha |
| 70 | 33.64 | 32.39 | 27.44 | 29.15 | 32.28 | 26.28 | Alpha |
| 71 | 24.57 | 23.52 | 24.75 | 19.97 | 23.46 | 24.51 | Alpha |
| 72 | 28.85 | 27.82 | 27.70 | 24.25 | 27.47 | 26.81 | Alpha |
| 73 | 32.68 | 29.96 | 26.98 | 27.11 | 31.13 | 25.73 | Alpha |
| 74 | 33.18 | 32.57 | 26.50 | 29.01 | 31.84 | 25.89 | Alpha |
| 75 | 24.89 | 23.90 | 28.60 | 20.20 | 23.77 | 27.36 | Alpha |
| 76 | 27.57 | 26.59 | 26.37 | 23.05 | 26.10 | 25.81 | Alpha |
| 77 | 33.76 | 32.06 | 26.67 | 27.41 | 30.77 | 25.43 | Alpha |
| 78 | 34.64 | 34.68 | 26.32 | 30.25 | 33.44 | 26.03 | Alpha |
| 79 | 22.21 | 21.04 | 25.26 | 17.17 | 21.41 | 24.60 | Alpha |
| 80 | 24.34 | 22.79 | 27.61 | 19.65 | 23.22 | 27.16 | Alpha |
| 81 | 29.17 | 27.66 | 31.11 | 24.19 | 27.28 | 30.49 | Alpha |
| 82 | 31.56 | 29.59 | 24.15 | 26.48 | 30.15 | 23.18 | Alpha |
| 83 | 33.59 | 32.38 | 24.82 | 28.22 | 32.51 | 24.10 | Alpha |
| 84 | 25.09 | 23.93 | 24.76 | 20.43 | 23.69 | 23.56 | Alpha |
| 85 | 24.15 | 23.05 | 27.07 | 19.38 | 22.97 | 26.14 | Alpha |
| 86 | 26.67 | 25.68 | 25.91 | 22.18 | 25.50 | 25.61 | Alpha |
| 87 | 29.76 | 29.05 | 27.36 | 25.19 | 28.29 | 26.49 | Alpha |
| 88 | 31.91 | 31.37 | 24.97 | 27.49 | 30.71 | 24.17 | Alpha |
| 89 | 21.26 | 18.79 | 29.75 | 18.60 | 18.69 | 28.49 | Alpha |
| 90 | 31.41 | 31.29 | 27.39 | 29.01 | 30.08 | 26.34 | Alpha |
| 91 | 28.23 | 27.46 | 26.07 | 25.42 | 27.23 | 25.79 | Alpha |
| 92 | 28.57 | 26.77 | 27.18 | 23.90 | 26.98 | 26.88 | Alpha |
| 93 | 30.02 | 29.30 | 28.31 | 24.95 | 28.49 | 28.00 | Alpha |
| 94 | 30.08 | 27.40 | 28.40 | 24.94 | 28.19 | 27.60 | Alpha |
| 95 | 34.18 | 33.91 | 24.01 | 32.93 | 31.43 | 22.35 | Delta |
| 96 | 25.57 | 23.41 | 25.49 | 23.62 | 21.20 | 23.72 | Delta |
| 97 | 29.02 | 27.62 | 26.90 | 27.29 | 26.20 | 24.03 | Delta |
| 98 | 20.35 | 20.45 | 29.93 | 18.36 | 18.83 | 28.15 | Beta |
| 99 | 28.04 | 27.73 | 28.22 | 26.12 | 25.40 | 26.02 | Beta |
| 100 | 27.68 | 27.99 | 26.68 | 25.70 | 25.70 | 24.55 | Beta |
| 101 | 23.98 | 25.33 | 24.32 | 23.69 | 23.56 | 24.45 | Delta |
| 102 | 28.39 | 27.28 | 27.14 | 26.10 | 28.45 | 27.20 | Delta |
